# Supplementary material for: Complementary Feeding Indicators in Relation to Micronutrient Status of Ghanaian Children Aged 6–23 Months: Results from a National Survey
Source: MDPI journal article supplement (doi:10.3390/life11090969), 2021-09-15
Supplement: s1 [file s1]

Table S1. Proportion of Children Achieving WHO IYCF Indicator by Age Group and Indicator Status among Children Aged 6-23 Months, Ghana 2017. **Table 5.** Adjusted Relative Risk of Anemia, Iron Deficiency, Iron Deficiency Anemia, and Vitamin A Deficiency in Children Aged 6-23 Months, Ghana 2017.

| Model                                                      | Characteristic                                 | Category   | Adjusted Relative Risk <sup>a</sup> | 95% CI       |
|------------------------------------------------------------|------------------------------------------------|------------|-------------------------------------|--------------|
| <i>Anemia model (n = 372) <sup>b</sup></i>                 | Consumed iron-rich foods in past 24 h          | Yes        | 0.61                                | (0.50, 0.75) |
|                                                            |                                                | No         | referent                            | -            |
|                                                            | Consumed eggs in past 24 h                     | Yes        | 0.54                                | (0.37, 0.80) |
|                                                            |                                                | No         | referent                            | -            |
|                                                            | Iron status <sup>b</sup>                       | Sufficient | 0.52                                | (0.42, 0.65) |
|                                                            |                                                | Deficient  | referent                            | -            |
|                                                            | Malaria status <sup>c</sup>                    | Positive   | 1.74                                | (1.36, 2.21) |
|                                                            |                                                | Negative   | referent                            | -            |
| <i>Iron deficiency model (n = 362) <sup>b</sup></i>        | Currently breastfeeding                        | Yes        | 1.58                                | (1.21, 2.05) |
|                                                            |                                                | No         | referent                            | -            |
|                                                            | Consumed legumes and/or nuts in past 24 h      | Yes        | 1.26                                | (1.03, 1.56) |
|                                                            |                                                | No         | referent                            | -            |
|                                                            | Malaria status <sup>c</sup>                    | Positive   | 0.26                                | (0.14, 0.50) |
|                                                            |                                                | Negative   | referent                            | -            |
|                                                            | Sickle cell status <sup>d</sup>                | HbAS, HbSS | 0.68                                | (0.47, 0.98) |
|                                                            |                                                | Normal     | referent                            | -            |
|                                                            | Child Sex                                      | Male       | 1.27                                | (1.05, 1.56) |
|                                                            |                                                | Female     | referent                            | -            |
| <i>Iron deficiency anemia model (n = 362) <sup>b</sup></i> | Currently breastfeeding                        | Yes        | 1.53                                | (1.03, 2.31) |
|                                                            |                                                | No         | referent                            | -            |
|                                                            | Consumed grains, roots and tubers in past 24 h | Yes        | 0.66                                | (0.44, 0.99) |
|                                                            |                                                | No         | referent                            | -            |
|                                                            | Consumed legumes and/or nuts in past 24 h      | Yes        | 1.43                                | (1.02, 2.02) |
|                                                            |                                                | No         | referent                            | -            |
|                                                            | Malaria status <sup>c</sup>                    | Positive   | 0.38                                | (0.19, 0.74) |
|                                                            |                                                | Negative   | referent                            | -            |
|                                                            | Wealth quintile                                | First      | referent                            | -            |
|                                                            |                                                | Second     | 0.81                                | (0.55, 1.20) |

|                                             |                  |         |          |              |
|---------------------------------------------|------------------|---------|----------|--------------|
| <b>Vitamin A deficiency model (n = 398)</b> | <b>Child Sex</b> | Middle  | 0.59     | (0.36, 0.99) |
|                                             |                  | Fourth  | 0.63     | (0.38, 1.05) |
|                                             |                  | Highest | 0.43     | (0.22, 0.82) |
|                                             |                  | Male    | 1.92     | (1.01, 3.65) |
|                                             |                  | Female  | referent | -            |

Note: All regression models contain child age in months as a continuous variable. <sup>a</sup> Adjusted relative risk calculated using Poisson regression. <sup>b</sup> Anemia defined as hemoglobin <120 g/L; iron deficiency (ID) is defined as BRINDA inflammation-adjusted serum ferritin <12 µg/L; iron deficiency anemia (IDA) is defined as concurrent anemia and ID. Iron deficiency defined as BRINDA inflammation-adjusted serum ferritin concentrations <12 µg/L. <sup>c</sup> Malaria positive defined as current or recent malaria infection by at least one Plasmodium species (i.e., falciparum, vivax, malariae, or ovale). <sup>d</sup> Sickle cell disease and trait represented by HbSS and HbAS, respectively.

### Children aged 6–23 months of age, Ghana, 2017

|                                  | 6–11 Months |                |                       | 12–17 Months |                |                       | 18–23 Months |                |                       | Total    |                |                       | <i>p</i> -Value <sup>c</sup> |
|----------------------------------|-------------|----------------|-----------------------|--------------|----------------|-----------------------|--------------|----------------|-----------------------|----------|----------------|-----------------------|------------------------------|
|                                  | <i>n</i>    | % <sup>a</sup> | (95% CI) <sup>b</sup> | <i>n</i>     | % <sup>a</sup> | (95% CI) <sup>b</sup> | <i>n</i>     | % <sup>a</sup> | (95% CI) <sup>b</sup> | <i>n</i> | % <sup>a</sup> | (95% CI) <sup>b</sup> |                              |
| <u>Currently breastfed</u>       |             |                |                       |              |                |                       |              |                |                       |          |                |                       |                              |
| Yes                              | 114         | 88.0           | (77.5, 93.9)          | 114          | 75.7           | (65.6, 83.5)          | 57           | 34.9           | (27.7, 43.0)          | 285      | 64.8           | (57.8, 71.2)          | <0.001                       |
| No                               | 11          | 12.0           | (6.1, 22.5)           | 29           | 24.3           | (16.5, 34.4)          | 88           | 65.1           | (57.0, 72.3)          | 128      | 35.2           | (28.8, 42.2)          |                              |
| <u>Minimum Dietary Diversity</u> |             |                |                       |              |                |                       |              |                |                       |          |                |                       |                              |
| Not diverse                      | 99          | 74.1           | (61.5, 83.6)          | 106          | 75.8           | (65.8, 83.6)          | 98           | 67.8           | (57.8, 76.3)          | 303      | 72.4           | (66.3, 77.8)          | 0.46                         |
| Diverse                          | 26          | 25.9           | (16.4, 38.5)          | 37           | 24.2           | (16.4, 34.2)          | 47           | 32.2           | (23.7, 42.2)          | 110      | 27.6           | (22.2, 33.7)          |                              |
| <u>Minimum Meal Frequency</u>    |             |                |                       |              |                |                       |              |                |                       |          |                |                       |                              |
| Not adequate                     | 58          | 45.9           | (35.8, 56.3)          | 79           | 57.0           | (48.5, 65.1)          | 114          | 80.9           | (74.4, 86.1)          | 251      | 62.3           | (57.1, 67.1)          | <0.001                       |
| Adequate frequency               | 67          | 54.1           | (43.7, 64.2)          | 64           | 43.0           | (34.9, 51.5)          | 31           | 19.1           | (13.9, 25.6)          | 162      | 37.7           | (32.9, 42.9)          |                              |
| <u>Minimum Acceptable Diet</u>   |             |                |                       |              |                |                       |              |                |                       |          |                |                       |                              |
| Not adequate                     | 110         | 83.3           | (70.9, 91.0)          | 125          | 89.5           | (82.7, 93.8)          | 131          | 90.6           | (84.1, 94.7)          | 366      | 88.1           | (83.3, 91.6)          | 0.26                         |
| Adequate diet                    | 15          | 16.7           | (9.0, 29.1)           | 18           | 10.5           | (6.2, 17.3)           | 14           | 9.4            | (5.3, 15.9)           | 47       | 11.9           | (8.4, 16.7)           |                              |

Consumption of iron  
rich food, foods fortified  
with iron

|                |    |      |              |    |      |              |     |      |              |     |      |              |        |
|----------------|----|------|--------------|----|------|--------------|-----|------|--------------|-----|------|--------------|--------|
| Consumed       | 68 | 59.7 | (50.0, 68.8) | 98 | 68.4 | (59.0, 76.5) | 120 | 82.2 | (73.5, 88.4) | 286 | 70.8 | (65.3, 75.8) | <0.010 |
| Didn't consume | 57 | 40.3 | (31.2, 50.0) | 45 | 31.6 | (23.5, 41.0) | 26  | 17.8 | (11.6, 26.5) | 128 | 29.2 | (24.2, 34.7) |        |

Consumption of vitamin  
A rich food, foods  
fortified with intrinsic  
provitamin A

|                |    |      |              |    |      |              |    |      |              |     |      |              |        |
|----------------|----|------|--------------|----|------|--------------|----|------|--------------|-----|------|--------------|--------|
| Consumed       | 45 | 37.9 | (28.5, 48.4) | 75 | 53.6 | (43.2, 63.7) | 89 | 61.4 | (52.5, 69.5) | 209 | 51.8 | (45.5, 57.9) | <0.010 |
| Didn't consume | 80 | 62.1 | (51.6, 71.5) | 68 | 46.4 | (36.3, 56.8) | 57 | 38.6 | (30.5, 47.5) | 205 | 48.2 | (42.1, 54.5) |        |

<sup>a</sup> Percentages weighted for unequal probability of selection. <sup>b</sup> CI = confidence interval, calculated taking into account the complex sampling design. <sup>c</sup> *p*-value < 0.05 indicates that the proportion in at least one subgroup is statistically significant

**Table S2. Current Breastfeeding, Minimum Dietary Diversity, Minimum Meal Frequency Indicators by Maternal Factors, Children Aged 6–23 Months of Age, Ghana, 2017**

|                                          | Currently breastfeeding |                              |                       | MDD      |                  |                       | MMF      |                  |                       |  |
|------------------------------------------|-------------------------|------------------------------|-----------------------|----------|------------------|-----------------------|----------|------------------|-----------------------|--|
|                                          | <i>n</i>                | % <sup>a</sup>               | (95% CI) <sup>b</sup> | <i>n</i> | % <sup>a</sup>   | (95% CI) <sup>b</sup> | <i>n</i> | % <sup>a</sup>   | (95% CI) <sup>b</sup> |  |
| <u>Mother/caregiver is literate</u>      |                         | <i>p</i> = 0.58 <sup>c</sup> |                       |          | <i>p</i> = 0.20  |                       |          | <i>p</i> = 0.55  |                       |  |
| Yes                                      | 102                     | 57.8                         | (46.8, 68.1)          | 102      | 31.7             | (21.5, 44.0)          | 102      | 28.2             | (21.5, 36.0)          |  |
| No                                       | 61                      | 63.3                         | (44.0, 79.2)          | 61       | 21.7             | (12.4, 35.2)          | 61       | 33.1             | (19.6, 50.1)          |  |
| <u>Mother/caregiver employment</u>       |                         | <i>p</i> = 0.13              |                       |          | <i>p</i> = 0.47  |                       |          | <i>p</i> = 0.18  |                       |  |
| No Job                                   | 119                     | 67.7                         | (58.0, 76.1)          | 119      | 25.2             | (17.1, 35.4)          | 119      | 32.9             | (25.3, 41.6)          |  |
| Agricultural or unskilled labor          | 46                      | 80.6                         | (65.6, 90.1)          | 46       | 35.0             | (24.4, 47.4)          | 46       | 51.2             | (33.4, 68.8)          |  |
| Skilled labor or professional            | 74                      | 60.3                         | (43.2, 75.1)          | 74       | 26.0             | (15.6, 40.0)          | 74       | 34.5             | (23.4, 47.7)          |  |
| <u>Mother/caregiver education status</u> |                         | <i>p</i> = 0.004             |                       |          | <i>p</i> = 0.020 |                       |          | <i>p</i> = 0.010 |                       |  |
| Never attended school                    | 74                      | 89.1                         | (78.6, 94.8)          | 74       | 24.7             | (16.8, 34.7)          | 74       | 54.5             | (42.0, 66.5)          |  |
| Completed primary school or less         | 45                      | 67.7                         | (43.9, 84.9)          | 45       | 23.9             | (13.3, 39.1)          | 45       | 33.7             | (17.5, 55.0)          |  |
| Attend or completed JSS                  | 89                      | 61.1                         | (47.1, 73.5)          | 89       | 21.1             | (12.1, 34.2)          | 89       | 33.5             | (25.3, 42.9)          |  |
| Attended SSS or higher                   | 31                      | 46.0                         | (29.4, 63.5)          | 31       | 50.7             | (30.7, 70.4)          | 31       | 16.9             | (7.4, 34.2)           |  |

<sup>a</sup> Percentages weighted for unequal probability of selection. <sup>b</sup> CI = confidence interval, calculated taking into account the complex sampling design. <sup>c</sup> *p*-value < 0.05 indicates that the proportion in at least one subgroup is statistically significant

**Table S3. Minimum Acceptable Diet, Iron-Rich Foods, and Vitamin A Rich Foods by Maternal Factors, Children Aged 6–23 Months of Age, Ghana, 2017**

|                                          | MAD      |                              |                       | IRF      |                 |                       | VARF     |                  |                       |  |
|------------------------------------------|----------|------------------------------|-----------------------|----------|-----------------|-----------------------|----------|------------------|-----------------------|--|
|                                          | <i>n</i> | % <sup>a</sup>               | (95% CI) <sup>b</sup> | <i>n</i> | % <sup>a</sup>  | (95% CI) <sup>b</sup> | <i>n</i> | % <sup>a</sup>   | (95% CI) <sup>b</sup> |  |
| <u>Mother/caregiver is literate</u>      |          | <i>p</i> = 0.55 <sup>c</sup> |                       |          | <i>p</i> = 0.51 |                       |          | <i>p</i> = 0.99  |                       |  |
| Yes                                      | 102      | 10                           | (5.5, 17.5)           | 102      | 73.7            | (64.0, 81.6)          | 102      | 41.1             | (32.5, 50.4)          |  |
| No                                       | 61       | 13.2                         | (5.9, 26.8)           | 61       | 78.5            | (62.7, 88.8)          | 61       | 41.1             | (27.6, 56.1)          |  |
| <u>Mother/caregiver employment</u>       |          | <i>p</i> = 0.001             |                       |          | <i>p</i> = 0.71 |                       |          | <i>p</i> = 0.08  |                       |  |
| No Job                                   | 119      | 6.4                          | (3.1, 12.8)           | 119      | 68.9            | (58.6, 77.6)          | 119      | 41.0             | (31.8, 50.8)          |  |
| Agricultural or unskilled labor          | 46       | 33.3                         | (22.5, 46.3)          | 46       | 74.5            | (59.4, 85.4)          | 46       | 56.5             | (42.3, 69.8)          |  |
| Skilled labor or professional            | 74       | 11.2                         | (5.2, 22.7)           | 74       | 73.3            | (60.7, 83.0)          | 74       | 35.2             | (23.8, 48.5)          |  |
| <u>Mother/caregiver education status</u> |          | <i>p</i> = 0.50              |                       |          | <i>p</i> = 0.06 |                       |          | <i>p</i> = 0.020 |                       |  |
| Never attended school                    | 74       | 16.1                         | (9.0, 27.1)           | 74       | 58.5            | (46.3, 69.8)          | 74       | 42.3             | (28.8, 57.0)          |  |
| Completed primary school or less         | 45       | 14.2                         | (6.2, 29.2)           | 45       | 74.8            | (55.6, 87.5)          | 45       | 44.3             | (28.5, 61.4)          |  |
| Attend or completed JSS                  | 89       | 11.6                         | (6.2, 20.6)           | 89       | 71.4            | (57.6, 82.1)          | 89       | 30.2             | (19.3, 44.0)          |  |
| Attended SSS or higher                   | 31       | 5.8                          | (1.5, 19.9)           | 31       | 88.0            | (72.9, 95.2)          | 31       | 66.1             | (48.9, 79.9)          |  |

<sup>a</sup> Percentages weighted for unequal probability of selection. <sup>b</sup> CI = confidence interval, calculated taking into account the complex sampling design. <sup>c</sup> *p*-value < 0.05 indicates that the proportion in at least one subgroup is statistically significant

**Table S4. Prevalence of Anemia, Iron Deficiency, Iron Deficiency Anemia, and Vitamin A Deficiency by Anthropometric Indicators among Children Aged 6–23 Months of Age, Ghana, 2017**

|                           | Anemia   |                              |                       | Iron deficiency |                 |                       | Iron deficiency anemia |                  |                       | Vitamin A deficiency |                  |                       |
|---------------------------|----------|------------------------------|-----------------------|-----------------|-----------------|-----------------------|------------------------|------------------|-----------------------|----------------------|------------------|-----------------------|
|                           | <i>n</i> | % <sup>a</sup>               | (95% CI) <sup>b</sup> | <i>n</i>        | % <sup>a</sup>  | (95% CI) <sup>b</sup> | <i>n</i>               | % <sup>a</sup>   | (95% CI) <sup>b</sup> | <i>n</i>             | % <sup>a</sup>   | (95% CI) <sup>b</sup> |
| <b><u>Stunting</u></b>    |          | <i>p</i> = 0.67 <sup>c</sup> |                       |                 | <i>p</i> = 0.26 |                       |                        | <i>p</i> = 0.020 |                       |                      | <i>p</i> = 0.030 |                       |
| Yes                       | 76       | 47.3                         | (37.2, 57.6)          | 76              | 50.9            | (40.5, 61.2)          | 76                     | 35.8             | (25.5, 47.7)          | 76                   | 4.1              | (1.4, 11.2)           |
| No                        | 320      | 44.6                         | (37.7, 51.7)          | 318             | 43.7            | (37.2, 50.3)          | 319                    | 23.6             | (19.1, 28.8)          | 318                  | 12.0             | (8.3, 17.0)           |
| <b><u>Wasting</u></b>     |          | <i>p</i> = 0.53              |                       |                 | <i>p</i> = 0.28 |                       |                        | <i>p</i> = 0.61  |                       |                      | <i>p</i> = 0.63  |                       |
| Yes                       | 48       | 50.7                         | (33.9, 67.3)          | 47              | 53.8            | (37.2, 69.6)          | 48                     | 28.8             | (17.5, 43.4)          | 47                   | 7.9              | (2.1, 25.3)           |
| No                        | 345      | 44.7                         | (38.1, 51.4)          | 344             | 43.6            | (37.6, 49.9)          | 344                    | 25.3             | (20.1, 31.3)          | 344                  | 10.8             | (7.5, 15.4)           |
| <b><u>Underweight</u></b> |          | <i>p</i> = 0.46              |                       |                 | <i>p</i> = 0.51 |                       |                        | <i>p</i> = 0.26  |                       |                      | <i>p</i> = 0.001 |                       |
| Yes                       | 78       | 49.6                         | (38.5, 60.7)          | 78              | 48.8            | (36.8, 60.9)          | 78                     | 31.5             | (21.0, 44.2)          | 78                   | 2.4              | (0.9, 6.1)            |
| No                        | 317      | 44.7                         | (37.9, 51.7)          | 315             | 44.2            | (38.0, 50.6)          | 316                    | 24.8             | (19.8, 30.6)          | 315                  | 12.4             | (8.6, 17.4)           |

<sup>a</sup> Percentages weighted for unequal probability of selection. <sup>b</sup> CI = confidence interval, calculated taking into account the complex sampling design. <sup>c</sup> *p*-value < 0.05 indicates that the proportion in at least one subgroup is statistically significant
